# Supplementary material for: Guidelines for Optimisation of a Multiplex Oligonucleotide Ligation-PCR for Characterisation of Microbial Pathogens in a Microsphere Suspension Array
Source: Hindawi journal article supplement (doi:10.1155/2015/790170), 2015-01-01
Supplement: f1 [file 790170.f1.pdf]

## Supplementary figures

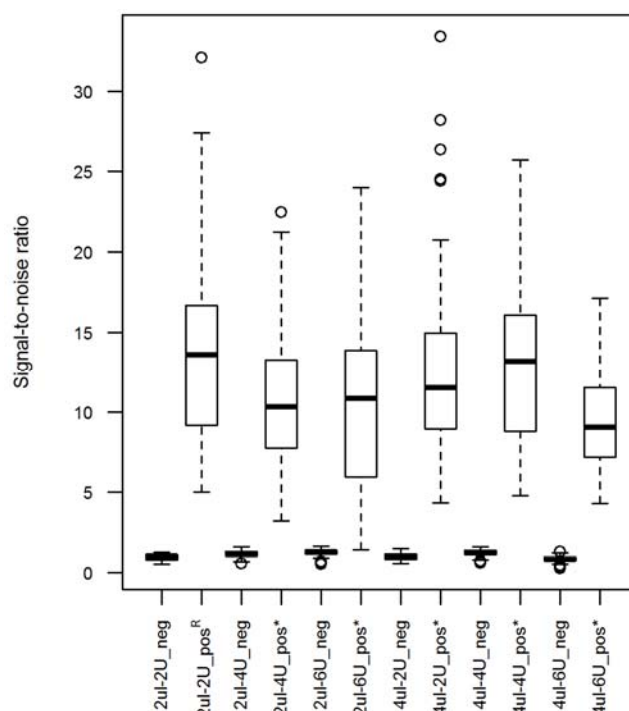

FIGURE S.1: Boxplot of signal-to-noise ratios for different combinations of DNA template volume and units of *Taq* DNA ligase in the ligation mix. Results of one of 2 independent tests are presented, *i.e.* results of 6 isolates x 6 conditions = 36 MOL-PCR assays (for each of the 6 conditions:  $n_{\text{total}}=120$  with  $n_{\text{neg}}=64$  and  $n_{\text{pos}}=56$ ). 2ul: 2  $\mu\text{l}$  of DNA template; 4 ul: 4  $\mu\text{l}$  of DNA template; 2U: 2 units of *Taq* DNA ligase; 4U: 4 units of *Taq* DNA ligase; 6U: 6 units of *Taq* DNA ligase; neg: expected negative results; pos: expected positive results; R: reference condition; \*: statistically significant difference with the reference condition.

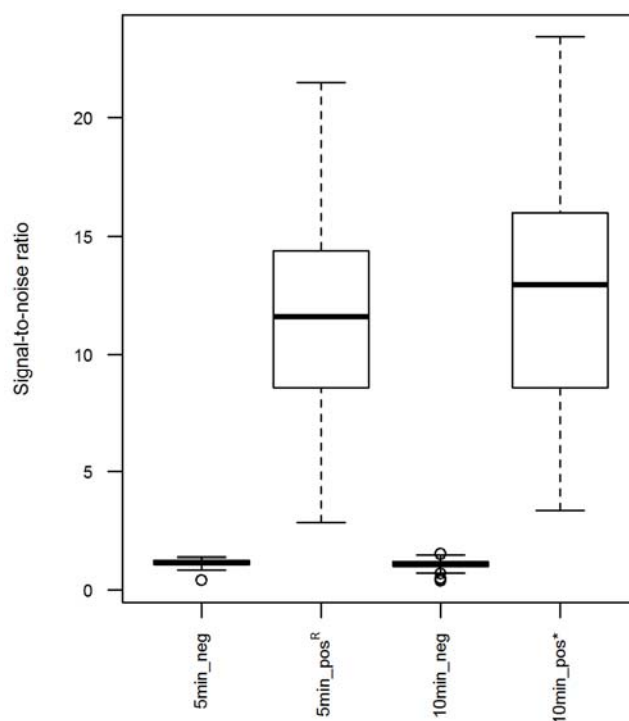

FIGURE S.2: Boxplot of signal-to-noise ratios for different initial denaturation times in the multiplex oligonucleotide ligation. Results of one of 2 independent tests are presented, *i.e.* results of 6 isolates x 2 conditions = 12 MOL-PCR assays (for each of the 2 conditions:  $n_{\text{total}}=120$  with  $n_{\text{neg}}=64$  and  $n_{\text{pos}}=56$ ). neg: expected negative results; pos: expected positive results; R: reference condition; \*: statistically significant difference with the reference condition.

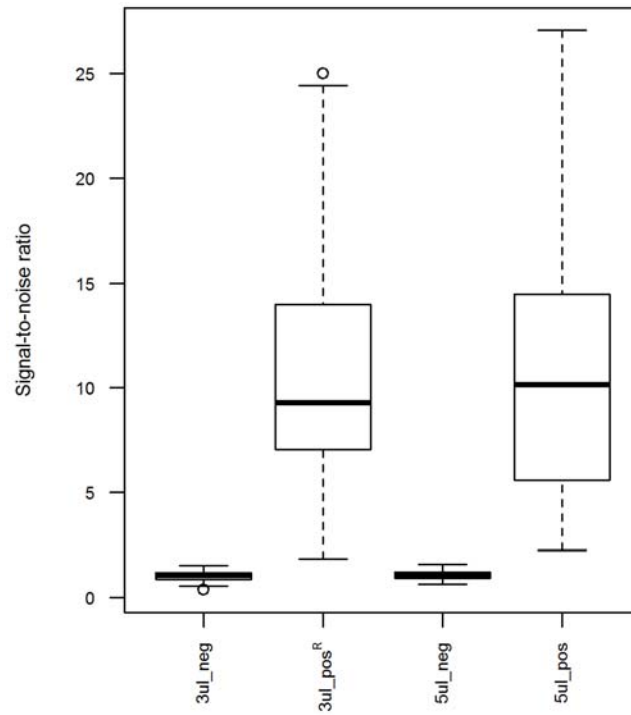

FIGURE S.3: Boxplot of signal-to-noise ratios for a volume of 3  $\mu$ l and 5  $\mu$ l of ligation product added to the PCR mix. Results of one of 2 independent tests are presented, *i.e.* results of 6 isolates  $\times$  2 conditions = 12 MOL-PCR assays (for each of the 2 conditions:  $n_{\text{total}}=120$  with  $n_{\text{neg}}=64$  and  $n_{\text{pos}}=56$ ). 3ul: 3  $\mu$ l of ligation product; 5ul: 5  $\mu$ l of ligation product; neg: expected negative results; pos: expected positive results; R: reference condition.

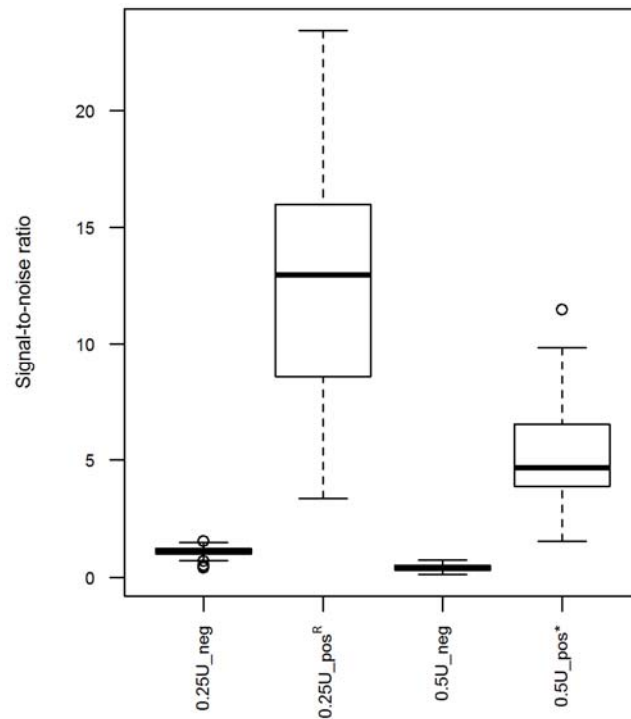

FIGURE S.4: Boxplot of signal-to-noise ratios for 0.25 units and 0.5 units of DNA polymerase the PCR mix. Results of one of 2 independent tests are presented, *i.e.* results of 6 isolates  $\times$  2 conditions = 12 MOL-PCR assays (for each of the 2 conditions:  $n_{\text{total}}=120$  with  $n_{\text{neg}}=64$  and  $n_{\text{pos}}=56$ ). 0.25U: 0.25 units of DNA polymerase; 0.5U: 0.5 units of DNA polymerase; neg: expected negative results; pos: expected positive results; R: reference condition; \*: statistically significant difference with the reference condition.

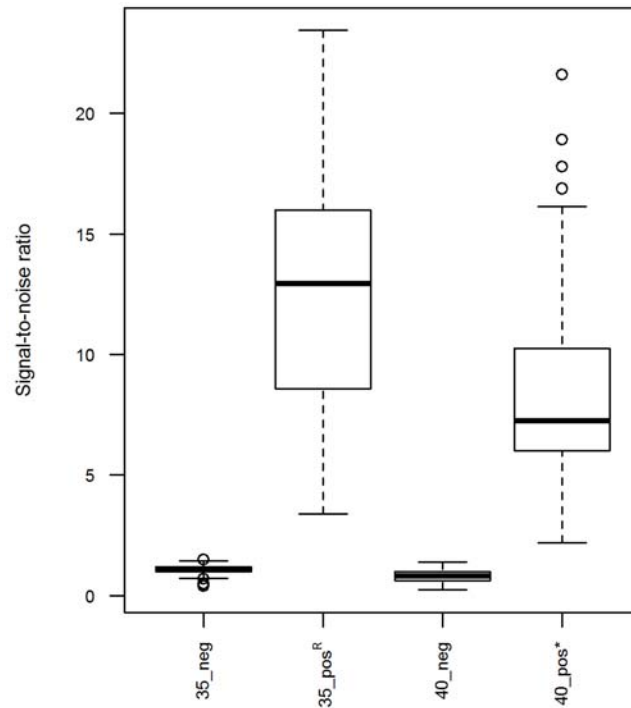

FIGURE S.5: Boxplot of signal-to-noise ratios for a PCR reaction with 35 and 40 cycles. Results of one of 2 independent tests are presented, *i.e.* results of 6 isolates x 2 conditions = 12 MOL-PCR assays (for each of the 2 conditions:  $n_{\text{total}}=120$  with  $n_{\text{neg}}=64$  and  $n_{\text{pos}}=56$ ). neg: expected negative results; pos: expected positive results; R: reference condition; \*: statistically significant difference with the reference condition.

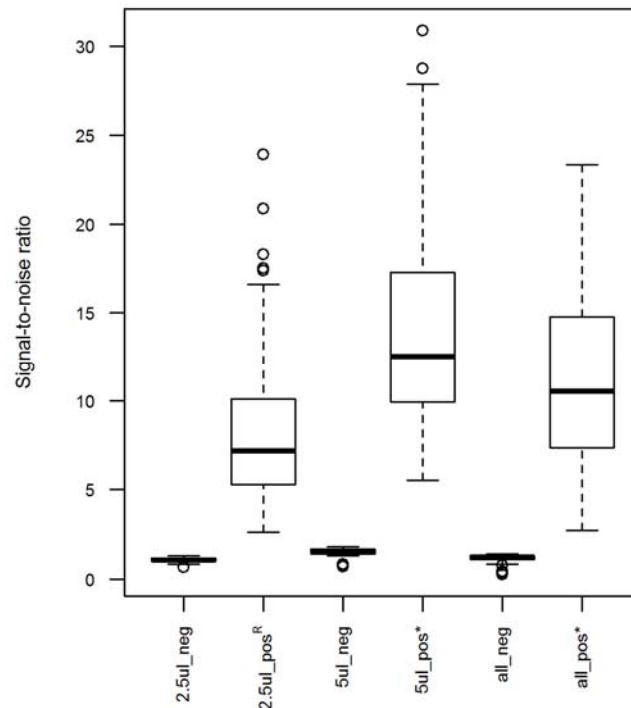

FIGURE S.6: Boxplot of signal-to-noise ratios for hybridisation of different volumes of PCR product to the MagPlex-TAG™ microspheres. Results of one of 2 independent tests are presented, *i.e.* results of 6 isolates x 3 conditions = 18 MOL-PCR assays (for each of the 3 conditions:  $n_{\text{total}}=120$  with  $n_{\text{neg}}=64$  and  $n_{\text{pos}}=56$ ). 2.5ul: 2.5  $\mu\text{l}$  of the PCR product was added to the hybridisation reaction; 5ul: 5  $\mu\text{l}$  of the PCR product was added to the hybridisation reaction; all: all (theoretically 10  $\mu\text{l}$ ) of the PCR product was added to the hybridisation reaction; neg: expected negative results; pos: expected positive results; R: reference condition; \*: statistically significant difference with the reference condition.

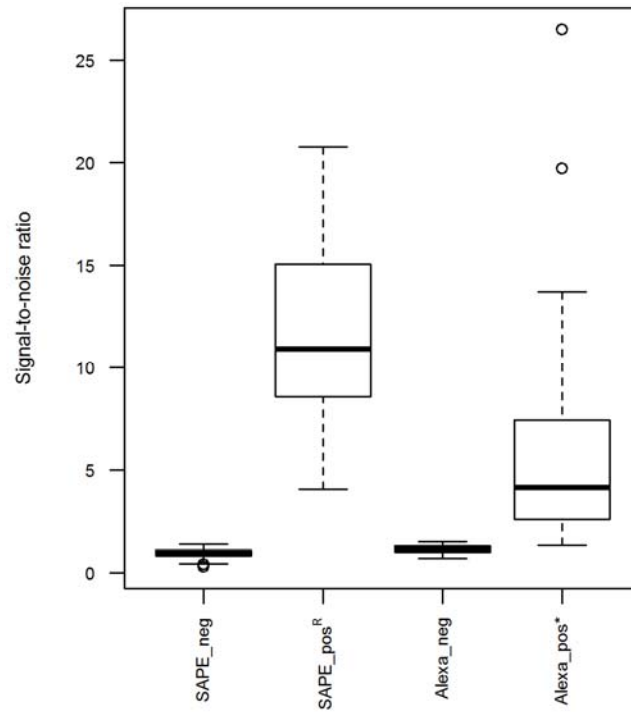

FIGURE S.7: Boxplot of signal-to-noise ratios for streptavidin-R-phycoerythrin (SAPE) and Alexa®532 as fluorescent reporters. Results of one of 2 independent tests are presented, *i.e.* results of 6 isolates x 2 conditions = 12 MOL-PCR assays (for each of the 2 conditions:  $n_{\text{total}}=120$  with  $n_{\text{neg}}=64$  and  $n_{\text{pos}}=56$ ). SAPE: streptavidin-R-phycoerythrin as fluorescent reporter; Alexa: Alexa®532 as fluorescent reporter; neg: expected negative results; pos: expected positive results; R: reference condition; \*: statistically significant difference with the reference condition.

## Supplementary data sets

Data set S.1: Median fluorescence intensity (MFI) of expected positive results for different methods of DNA isolation (data set related to Figure 2)

| Result  | 300ul_pos | 50ul_pos | IGM_pos |
|---------|-----------|----------|---------|
| 1       | 427       | 884      | 745     |
| 2       | 297       | 509.5    | 894     |
| 3       | 748       | 742.5    | 887     |
| 4       | 592       | 932      | 1088    |
| 5       | 486       | 610      | 896     |
| 6       | 1184.5    | 510      | 194     |
| 7       | 891.5     | 1870     | 1587    |
| 8       | 625       | 1216     | 1885    |
| 9       | 1508      | 1575.5   | 1797    |
| 10      | 1284      | 1901.5   | 2099    |
| 11      | 944       | 1294     | 1811    |
| 12      | 2367      | 1130.5   | 672     |
| 13      | 146       | 332      | 296     |
| 14      | 343       | 466      | 394     |
| 15      | 170       | 274.5    | 332     |
| 16      | 326       | 815      | 634     |
| 17      | 330       | 1066     | 1027    |
| 18      | 757       | 904      | 829     |
| 19      | 340       | 533      | 832     |
| 20      | 183.5     | 405      | 383     |
| 21      | 215       | 334.5    | 456     |
| 22      | 415       | 997      | 818     |
| 23      | 906       | 1214     | 1021    |
| 24      | 501       | 684.5    | 922     |
| 25      | 459       | 941      | 780     |
| 26      | 529       | 709      | 1036    |
| 27      | 180       | 291      | 728.5   |
| 28      | 425       | 471      | 624     |
| 29      | 329       | 631      | 907     |
| 30      | 360.5     | 1174.5   | 1197    |
| 31      | 844.5     | 994      | 909     |
| 32      | 149.5     | 359      | 277     |
| 33      | 174       | 579      | 558.5   |
| 34      | 400.5     | 486.5    | 386     |
| 35      | 190       | 288      | 313     |
| 36      | 230       | 512.5    | 943.5   |
| 37      | 630       | 775      | 914     |
| 38      | 503       | 1058     | 1199.5  |
| 39      | 221       | 662      | 637     |
| 40      | 202       | 390      | 1010    |
| 41      | 174       | 383      | 321     |
| 42      | 186       | 301.5    | 420     |
| 43      | 372       | 1259     | 975     |
| 44      | 413.5     | 854.5    | 1475.5  |
| 45      | 1549      | 1150     | 579     |
| 46      | 167       | 596      | 400     |
| 47      | 184       | 348      | 691     |
| 48      | 527       | 959.5    | 974.5   |
| 49      | 156       | 400      | 373     |
| 50      | 290       | 728      | 649     |
| 51      | 302       | 480.5    | 856     |
| 52      | 1080.5    | 1643     | 1688    |
| 53      | 1184      | 1473.5   | 1818    |
| 54      | 1017      | 1592     | 1562    |
| 55      | 967       | 1309     | 1775    |
| 56      | 1828      | 1268     | 939     |
| Minimum | 146       | 274.5    | 194     |
| Maximum | 2367      | 1901.5   | 2099    |
| Average | 575.2     | 826.2    | 900.3   |

Data set S.2: Median fluorescence intensity (MFI) of the no-template-control (NTC) for different probe concentrations in the ligation mix (data set related to Figure 3)

| Marker                      | 2nM NTC | 1nM NTC |
|-----------------------------|---------|---------|
| Internal positive control_1 | 87.5    | 192     |
| internal positive control_2 | 95      | 419     |
| SAL-10                      | 80      | 149     |
| SAL-11                      | 92      | 217     |
| SAL-16                      | 105     | 343     |
| SAL-23                      | 95.5    | 162     |
| SAL-25                      | 78      | 183     |
| SAL-29                      | 93.5    | 167     |
| SAL-33                      | 271     | 465     |
| SAL-45                      | 106     | 357.5   |
| SAL-49                      | 79      | 140     |
| SAL-50                      | 101.5   | 200     |
| SAL-51                      | 102     | 175     |
| SAL-53                      | 131     | 189     |
| SAL-55                      | 84      | 128     |
| SAL-67                      | 103     | 375     |
| SAL-68                      | 130     | 182     |
| SAL-69                      | 143     | 221     |
| SAL-70                      | 107     | 289.5   |
| SAL-74                      | 108     | 307     |
| Mininum                     | 78      | 128     |
| Maximum                     | 271     | 465     |
| Average                     | 109.6   | 243.1   |

Data set S.3: Median fluorescence intensity (MFI) of expected positive results for different probe concentrations in the ligation mix (data set related to Figure 3)

| Result  | 2nM pos | 5nM pos |
|---------|---------|---------|
| 1       | 977     | 659     |
| 2       | 245.5   | 595     |
| 3       | 1061    | 670     |
| 4       | 1060    | 702     |
| 5       | 956.5   | 640     |
| 6       | 1013.5  | 682     |
| 7       | 1819    | 1680    |
| 8       | 276.5   | 1624.5  |
| 9       | 1838    | 1742    |
| 10      | 1973.5  | 1791    |
| 11      | 1655.5  | 1670    |
| 12      | 1798    | 1799    |
| 13      | 745     | 447     |
| 14      | 1206    | 854.5   |
| 15      | 685     | 432     |
| 16      | 862.5   | 712     |
| 17      | 432.5   | 1150    |
| 18      | 1275.5  | 1105    |
| 19      | 801     | 732     |
| 20      | 587     | 388.5   |
| 21      | 526.5   | 330     |
| 22      | 931     | 874     |
| 23      | 1461    | 1366    |
| 24      | 871     | 820     |
| 25      | 1287    | 1244.5  |
| 26      | 1180    | 1142    |
| 27      | 110     | 424     |
| 28      | 749     | 484     |
| 29      | 1336.5  | 510.5   |
| 30      | 442     | 1454    |
| 31      | 1388    | 1446    |
| 32      | 798     | 344.5   |
| 33      | 526     | 766     |
| 34      | 1271    | 655     |
| 35      | 659.5   | 268     |
| 36      | 128.5   | 793     |
| 37      | 682.5   | 825     |
| 38      | 1325.5  | 950.5   |
| 39      | 1038    | 502     |
| 40      | 991     | 434     |
| 41      | 920     | 527     |
| 42      | 801     | 471     |
| 43      | 920     | 1214    |
| 44      | 892.5   | 1245    |
| 45      | 1770.5  | 1300    |
| 46      | 365.5   | 508     |
| 47      | 339     | 496     |
| 48      | 1310    | 1488    |
| 49      | 901     | 370.5   |
| 50      | 1411.5  | 1497    |
| 51      | 1315    | 1518    |
| 52      | 1701    | 1817    |
| 53      | 1555    | 1893    |
| 54      | 1738.5  | 1488    |
| 55      | 1602.5  | 1495.5  |
| 56      | 2022    | 1563.5  |
| Minimum | 110     | 268     |
| Maximum | 2022    | 1893    |
| Average | 1045.3  | 975     |

Data set S.4: Median fluorescence intensity (MFI) of the no-template-control (NTC) for 2  $\mu$ l of DNA template volume with different numbers of *Taq* DNA ligase units in the ligation mix (data set related to Figure S.1)

| Marker                      | 2ul-2U | NTC   | 2ul-4U | NTC   | 2ul-6U | NTC  |
|-----------------------------|--------|-------|--------|-------|--------|------|
| Internal positive control_1 |        | 67.5  |        | 90    |        | 93   |
| internal positive control_2 |        | 73.5  |        | 96    |        | 104  |
| SAL-10                      |        | 71    |        | 82    |        | 87   |
| SAL-11                      |        | 77    |        | 91    |        | 87.5 |
| SAL-16                      |        | 81    |        | 101   |        | 88.5 |
| SAL-23                      |        | 78    |        | 107   |        | 85   |
| SAL-25                      |        | 70    |        | 94    |        | 88.5 |
| SAL-29                      |        | 74    |        | 90    |        | 82   |
| SAL-33                      |        | 113.5 |        | 111.5 |        | 121  |
| SAL-45                      |        | 88.5  |        | 95    |        | 96   |
| SAL-49                      |        | 75    |        | 84    |        | 87.5 |
| SAL-50                      |        | 75    |        | 86    |        | 90   |
| SAL-51                      |        | 73.5  |        | 81    |        | 83   |
| SAL-53                      |        | 66    |        | 75    |        | 83   |
| SAL-55                      |        | 63    |        | 86    |        | 73   |
| SAL-67                      |        | 70    |        | 80.5  |        | 84.5 |
| SAL-68                      |        | 99    |        | 130   |        | 168  |
| SAL-69                      |        | 82.5  |        | 91    |        | 99   |
| SAL-70                      |        | 67    |        | 75.5  |        | 84   |
| SAL-74                      |        | 70    |        | 90    |        | 99   |
| Mininum                     |        | 63    |        | 75    |        | 73   |
| Maximum                     |        | 113.5 |        | 130   |        | 168  |
| Average                     |        | 76.8  |        | 91.8  |        | 94.2 |

Data set S.5: Median fluorescence intensity (MFI) of expected positive results for different volumes of DNA template with 2 units of *Taq* DNA ligase in the ligation mix (data set related to Figure S.1)

| Result  | 2ul-2U pos | 4ul-2U pos |
|---------|------------|------------|
| 1       | 1020       | 1053       |
| 2       | 1058.5     | 1029       |
| 3       | 980.5      | 915        |
| 4       | 1416       | 1238.5     |
| 5       | 1100       | 893        |
| 6       | 1090       | 1082.5     |
| 7       | 1758       | 1784       |
| 8       | 1871       | 1809       |
| 9       | 1841       | 1668       |
| 10      | 2361       | 2160       |
| 11      | 1880       | 1625       |
| 12      | 2015       | 1995.5     |
| 13      | 631.5      | 687        |
| 14      | 1015       | 980.5      |
| 15      | 758.5      | 644        |
| 16      | 829.5      | 874        |
| 17      | 1208.5     | 1229       |
| 18      | 1208       | 1159       |
| 19      | 956        | 792        |
| 20      | 515        | 607.5      |
| 21      | 679        | 506        |
| 22      | 989        | 1017       |
| 23      | 1449       | 1370.5     |
| 24      | 1074       | 897        |
| 25      | 1036       | 1056       |
| 26      | 1185       | 887        |
| 27      | 488        | 469.5      |
| 28      | 555        | 497        |
| 29      | 899.5      | 628        |
| 30      | 1408.5     | 1443       |
| 31      | 1331       | 1353       |
| 32      | 636        | 725        |
| 33      | 1186       | 1208       |
| 34      | 1170       | 1069       |
| 35      | 791        | 631        |
| 36      | 739.5      | 732        |
| 37      | 704.5      | 657        |
| 38      | 1232       | 1022       |
| 39      | 497        | 436.5      |
| 40      | 628        | 413        |
| 41      | 449.5      | 479        |
| 42      | 551        | 402        |
| 43      | 778        | 748        |
| 44      | 872        | 680        |
| 45      | 994        | 1035.5     |
| 46      | 314        | 318        |
| 47      | 428        | 273.5      |
| 48      | 1129       | 1147       |
| 49      | 853        | 953.5      |
| 50      | 1014.5     | 938        |
| 51      | 1150       | 944        |
| 52      | 1630.5     | 1604.5     |
| 53      | 1702.5     | 1474       |
| 54      | 1376       | 1328       |
| 55      | 1475       | 1168       |
| 56      | 1604.5     | 1614       |
| Minimum | 314        | 273.5      |
| Maximum | 2361       | 2160       |
| Average | 1080.6     | 1006.3     |

Data set S.6: Median fluorescence intensity (MFI) of the no-template-control (NTC) and of expected positive results for different initial denaturation times in the multiplex oligonucleotide ligation (data set related to Figure S.2)

| Marker                      | 5min NTC | 10min NTC |
|-----------------------------|----------|-----------|
| Internal positive control_1 | 92.5     | 77        |
| internal positive control_2 | 107      | 94        |
| SAL-10                      | 91       | 77.5      |
| SAL-11                      | 96.5     | 81        |
| SAL-16                      | 127.5    | 125       |
| SAL-23                      | 90       | 79.5      |
| SAL-25                      | 89       | 75        |
| SAL-29                      | 96       | 74        |
| SAL-33                      | 104      | 98        |
| SAL-45                      | 116      | 113       |
| SAL-49                      | 84       | 63        |
| SAL-50                      | 94       | 79.5      |
| SAL-51                      | 89       | 77        |
| SAL-53                      | 88       | 63.5      |
| SAL-55                      | 82       | 63        |
| SAL-67                      | 76       | 73        |
| SAL-68                      | 231      | 197       |
| SAL-69                      | 85       | 78        |
| SAL-70                      | 79       | 72        |
| SAL-74                      | 105.5    | 87        |
| Mininum                     | 76       | 63        |
| Maximum                     | 231      | 197       |
| Average                     | 101.2    | 87.4      |

| Result  | 5min pos | 10min pos |
|---------|----------|-----------|
| 1       | 797      | 767       |
| 2       | 984      | 907       |
| 3       | 881      | 762       |
| 4       | 1087     | 1057      |
| 5       | 947.5    | 892       |
| 6       | 991.5    | 968       |
| 7       | 1886     | 1883.5    |
| 8       | 2106     | 2046.5    |
| 9       | 2113.5   | 1905      |
| 10      | 2300     | 2201.5    |
| 11      | 2097     | 2051      |
| 12      | 2174     | 2159      |
| 13      | 566      | 531.5     |
| 14      | 983      | 896.5     |
| 15      | 772.5    | 672       |
| 16      | 911.5    | 895       |
| 17      | 1338     | 1309      |
| 18      | 1285     | 1157.5    |
| 19      | 1079     | 1069      |
| 20      | 712      | 688       |
| 21      | 927      | 841       |
| 22      | 1029.5   | 963       |
| 23      | 1560     | 1405      |
| 24      | 1241.5   | 1203      |
| 25      | 975      | 957       |
| 26      | 1118.5   | 1133      |
| 27      | 657      | 554       |
| 28      | 503      | 365.5     |
| 29      | 828      | 755.5     |
| 30      | 1500     | 1393      |
| 31      | 1442     | 1288.5    |
| 32      | 841      | 738       |
| 33      | 1620.5   | 1515      |
| 34      | 1449     | 1184.5    |
| 35      | 1096     | 952.5     |
| 36      | 1072     | 952       |
| 37      | 821.5    | 694       |
| 38      | 1227     | 1207      |
| 39      | 570      | 439       |
| 40      | 724      | 614       |
| 41      | 446.5    | 401       |
| 42      | 534      | 555.5     |
| 43      | 1102     | 915.5     |
| 44      | 1264     | 1173      |
| 45      | 1452     | 1310      |
| 46      | 444      | 390       |
| 47      | 549.5    | 532       |
| 48      | 1128     | 1155      |
| 49      | 655      | 662       |
| 50      | 968.5    | 823       |
| 51      | 1174     | 1100      |
| 52      | 1400     | 1368      |
| 53      | 1494     | 1465.5    |
| 54      | 1348     | 1240      |
| 55      | 1461.5   | 1344      |
| 56      | 1674     | 1535      |
| Mininum | 444      | 365.5     |
| Maximum | 2300     | 2201.5    |
| Average | 1148.4   | 1070.4    |

Data set S.7: Median fluorescence intensity (MFI) of the no-template-control (NTC) and of expected positive results for 0.25 units and 0.5 units of DNA polymerase in the PCR mix (data set related to Figure S.4)

| Marker                      | 0.25U NTC | 0.5U NTC |
|-----------------------------|-----------|----------|
| Internal positive control_1 | 92.5      | 322      |
| internal positive control_2 | 107       | 593.5    |
| SAL-10                      | 91        | 277      |
| SAL-11                      | 96.5      | 425      |
| SAL-16                      | 127.5     | 994      |
| SAL-23                      | 90        | 380      |
| SAL-25                      | 89        | 166      |
| SAL-29                      | 96        | 325      |
| SAL-33                      | 104       | 403      |
| SAL-45                      | 116       | 756.5    |
| SAL-49                      | 84        | 170.5    |
| SAL-50                      | 94        | 395      |
| SAL-51                      | 89        | 232      |
| SAL-53                      | 88        | 316      |
| SAL-55                      | 82        | 175      |
| SAL-67                      | 76        | 220      |
| SAL-68                      | 231       | 285      |
| SAL-69                      | 85        | 151.5    |
| SAL-70                      | 79        | 204      |
| SAL-74                      | 105.5     | 494      |
| Mininum                     | 76        | 151.5    |
| Maximum                     | 231       | 994      |
| Average                     | 101.2     | 364.3    |

| Result  | 0.25U pos | 0.5U pos |
|---------|-----------|----------|
| 1       | 797       | 1277.5   |
| 2       | 984       | 1479     |
| 3       | 881       | 1153     |
| 4       | 1087      | 1555     |
| 5       | 947.5     | 1395     |
| 6       | 991.5     | 1538.5   |
| 7       | 1886      | 2736.5   |
| 8       | 2106      | 2999     |
| 9       | 2113.5    | 2707     |
| 10      | 2300      | 2949     |
| 11      | 2097      | 2972     |
| 12      | 2174      | 3065     |
| 13      | 566       | 1017     |
| 14      | 983       | 1368     |
| 15      | 772.5     | 1208.5   |
| 16      | 911.5     | 1563     |
| 17      | 1338      | 2014     |
| 18      | 1285      | 1761     |
| 19      | 1079      | 1745     |
| 20      | 712       | 1499     |
| 21      | 927       | 1648     |
| 22      | 1029.5    | 1892.5   |
| 23      | 1560      | 2141.5   |
| 24      | 1241.5    | 2046     |
| 25      | 975       | 1463     |
| 26      | 1118.5    | 1623     |
| 27      | 657       | 1023     |
| 28      | 503       | 732      |
| 29      | 828       | 1359     |
| 30      | 1500      | 1742     |
| 31      | 1442      | 1512     |
| 32      | 841       | 1684     |
| 33      | 1620.5    | 2588     |
| 34      | 1449      | 2102.5   |
| 35      | 1096      | 1887     |
| 36      | 1072      | 1627     |
| 37      | 821.5     | 1449     |
| 38      | 1227      | 1953     |
| 39      | 570       | 1300     |
| 40      | 724       | 1527.5   |
| 41      | 446.5     | 895      |
| 42      | 534       | 1067     |
| 43      | 1102      | 2206     |
| 44      | 1264      | 2412     |
| 45      | 1452      | 2634     |
| 46      | 444       | 1060.5   |
| 47      | 549.5     | 1341     |
| 48      | 1128      | 1763     |
| 49      | 655       | 1495     |
| 50      | 968.5     | 1296     |
| 51      | 1174      | 1491.5   |
| 52      | 1400      | 1880.5   |
| 53      | 1494      | 1968     |
| 54      | 1348      | 2161     |
| 55      | 1461.5    | 2244.5   |
| 56      | 1674      | 2499     |
| Mininum | 444       | 732      |
| Maximum | 2300      | 3065     |
| Average | 1148.4    | 1780.6   |

Data set S.8: Median fluorescence intensity (MFI) of the no-template-control (NTC) and of expected positive results for a PCR reaction with 35 and 40 cycles (data set related to Figure S.5)

| Marker                      | 35 NTC | 40 NTC |
|-----------------------------|--------|--------|
| Internal positive control_1 | 92.5   | 163.5  |
| internal positive control_2 | 107    | 431    |
| SAL-10                      | 91     | 103.5  |
| SAL-11                      | 96.5   | 192    |
| SAL-16                      | 127.5  | 470    |
| SAL-23                      | 90     | 169    |
| SAL-25                      | 89     | 99.5   |
| SAL-29                      | 96     | 135.5  |
| SAL-33                      | 104    | 200.5  |
| SAL-45                      | 116    | 389    |
| SAL-49                      | 84     | 112    |
| SAL-50                      | 94     | 151.5  |
| SAL-51                      | 89     | 148    |
| SAL-53                      | 88     | 117    |
| SAL-55                      | 82     | 99.5   |
| SAL-67                      | 76     | 116    |
| SAL-68                      | 231    | 119    |
| SAL-69                      | 85     | 135    |
| SAL-70                      | 79     | 86     |
| SAL-74                      | 105.5  | 210.5  |
| Mininum                     | 76     | 86     |
| Maximum                     | 231    | 470    |
| Average                     | 101.2  | 182.4  |

| Result  | 35 pos | 40 pos |
|---------|--------|--------|
| 1       | 797    | 1017   |
| 2       | 984    | 1076.5 |
| 3       | 881    | 1060   |
| 4       | 1087   | 1295   |
| 5       | 947.5  | 1249   |
| 6       | 991.5  | 1323   |
| 7       | 1886   | 2275   |
| 8       | 2106   | 2308   |
| 9       | 2113.5 | 2426   |
| 10      | 2300   | 2602   |
| 11      | 2097   | 2553   |
| 12      | 2174   | 2662   |
| 13      | 566    | 647    |
| 14      | 983    | 1056.5 |
| 15      | 772.5  | 921.5  |
| 16      | 911.5  | 1162   |
| 17      | 1338   | 1393   |
| 18      | 1285   | 1411.5 |
| 19      | 1079   | 1383   |
| 20      | 712    | 1017   |
| 21      | 927    | 1352   |
| 22      | 1029.5 | 1274.5 |
| 23      | 1560   | 1807   |
| 24      | 1241.5 | 1624.5 |
| 25      | 975    | 1371   |
| 26      | 1118.5 | 1679.5 |
| 27      | 657    | 817    |
| 28      | 503    | 682    |
| 29      | 828    | 1276   |
| 30      | 1500   | 1414   |
| 31      | 1442   | 1378   |
| 32      | 841    | 1070   |
| 33      | 1620.5 | 1799   |
| 34      | 1449   | 1590   |
| 35      | 1096   | 1379   |
| 36      | 1072   | 1210.5 |
| 37      | 821.5  | 1155   |
| 38      | 1227   | 1542   |
| 39      | 570    | 635    |
| 40      | 724    | 899    |
| 41      | 446.5  | 665    |
| 42      | 534    | 918    |
| 43      | 1102   | 1464   |
| 44      | 1264   | 1890   |
| 45      | 1452   | 2079.5 |
| 46      | 444    | 681    |
| 47      | 549.5  | 1055   |
| 48      | 1128   | 1415   |
| 49      | 655    | 818    |
| 50      | 968.5  | 1111   |
| 51      | 1174   | 1394   |
| 52      | 1400   | 1624   |
| 53      | 1494   | 1857   |
| 54      | 1348   | 1636   |
| 55      | 1461.5 | 1880   |
| 56      | 1674   | 2082   |
| Mininum | 444    | 635    |
| Maximum | 2300   | 2662   |
| Average | 1148.4 | 1417.2 |

Data set S.9: Median fluorescence intensity (MFI) of expected positive results for different combinations of amount of microspheres in the hybridisation reaction and streptavidin-R-phycoerythrin concentration in the reporter mix (data set related to Figure 4)

| Result  | 2500-10ug_pos | 375-4ug_pos | 750-4ug_pos | 2500-4ug_pos | 375-10ug_pos | 750-10ug_pos |
|---------|---------------|-------------|-------------|--------------|--------------|--------------|
| 1       | 697           | 1143        | 1091        | 490          | 1534         | 1397         |
| 2       | 656           | 1173.5      | 1150        | 447          | 1679         | 1380         |
| 3       | 637           | 1121        | 1061.5      | 476          | 1471.5       | 1204.5       |
| 4       | 731           | 1563        | 1369.5      | 845          | 2055         | 1571         |
| 5       | 606           | 1116.5      | 1098        | 476.5        | 1626.5       | 1269         |
| 6       | 444           | 1224        | 1104        | 341.5        | 1676         | 1324         |
| 7       | 1421          | 2146        | 2196        | 1070         | 2871         | 2717         |
| 8       | 1411          | 2317        | 2244.5      | 935          | 3031         | 2680         |
| 9       | 1400.5        | 2145        | 2192        | 1089         | 2731         | 2494         |
| 10      | 1547          | 2479.5      | 2626.5      | 1720.5       | 3319         | 2991.5       |
| 11      | 1353          | 2150.5      | 2203        | 1074         | 2870         | 2548         |
| 12      | 918           | 2248.5      | 2281.5      | 852          | 3015         | 2691         |
| 13      | 445           | 627.5       | 662         | 240          | 925          | 873.5        |
| 14      | 593           | 1040        | 996         | 389          | 1444         | 1170.5       |
| 15      | 435           | 739.5       | 721.5       | 251          | 1130         | 837          |
| 16      | 760           | 1112.5      | 1119        | 524.5        | 1483.5       | 1419.5       |
| 17      | 1064          | 1465        | 1394        | 726.5        | 1905         | 1726.5       |
| 18      | 1021          | 1431        | 1316        | 735.5        | 1817         | 1620.5       |
| 19      | 714.5         | 1158        | 1165        | 532          | 1662         | 1354         |
| 20      | 493           | 796         | 906         | 299          | 1169         | 1103.5       |
| 21      | 434           | 797         | 915         | 278          | 1332         | 952          |
| 22      | 785           | 1448.5      | 1329        | 552          | 1801         | 1639         |
| 23      | 1138          | 1730        | 1656        | 834.5        | 2225         | 1907         |
| 24      | 755           | 1331        | 1356.5      | 546          | 1864         | 1512         |
| 25      | 680           | 1131        | 1131        | 463          | 1530         | 1475.5       |
| 26      | 600.5         | 1088        | 1137.5      | 437.5        | 1523.5       | 1275         |
| 27      | 393           | 691         | 628.5       | 198          | 927.5        | 777          |
| 28      | 421           | 544         | 593         | 252.5        | 771          | 735          |
| 29      | 479           | 1025.5      | 1057        | 353.5        | 1286         | 1028         |
| 30      | 1198.5        | 1305.5      | 1454        | 785          | 1813.5       | 1842         |
| 31      | 1173          | 1358        | 1428        | 821          | 1673         | 1655.5       |
| 32      | 571           | 909         | 992.5       | 387          | 1250         | 1202.5       |
| 33      | 965           | 1566        | 1595.5      | 665          | 1916.5       | 1658         |
| 34      | 822.5         | 1341        | 1399.5      | 613          | 1698         | 1518         |
| 35      | 523.5         | 918         | 992.5       | 350          | 1349         | 1037         |
| 36      | 580           | 1234        | 1163        | 350          | 1509.5       | 1314.5       |
| 37      | 588           | 970         | 968         | 376          | 1247.5       | 1142         |
| 38      | 745           | 1722        | 1579        | 685          | 2052         | 1706         |
| 39      | 523.5         | 1005        | 699         | 310          | 1166         | 936          |
| 40      | 448           | 632         | 679         | 282          | 989          | 803          |
| 41      | 378           | 693         | 608.5       | 215.5        | 928          | 802          |
| 42      | 369           | 550.5       | 598         | 210          | 1030.5       | 689          |
| 43      | 819           | 1973        | 1594        | 662          | 2382.5       | 1947         |
| 44      | 657           | 1426.5      | 1556.5      | 566          | 2063.5       | 1615.5       |
| 45      | 498           | 1606        | 1472        | 453          | 2113.5       | 1686         |
| 46      | 416           | 908         | 737         | 246          | 1329.5       | 1013.5       |
| 47      | 361           | 649         | 750         | 234          | 1129.5       | 831          |
| 48      | 757           | 1549        | 1391        | 485          | 1866         | 1707         |
| 49      | 547           | 762         | 878.5       | 327          | 983          | 1037.5       |
| 50      | 815           | 1464        | 1286        | 536          | 1792.5       | 1608.5       |
| 51      | 779           | 1297        | 1310        | 559          | 1791         | 1461         |
| 52      | 982           | 1921        | 1687.5      | 658          | 2418         | 2157.5       |
| 53      | 971.5         | 1938.5      | 1723        | 700.5        | 2322.5       | 2020         |
| 54      | 924           | 1673        | 1549        | 660.5        | 2187         | 2029         |
| 55      | 779           | 1433        | 1538        | 616          | 2154         | 1748         |
| 56      | 685.5         | 1713        | 1683        | 597.5        | 2398         | 2037         |
| Mininum | 361           | 544         | 593         | 198          | 771          | 689          |
| Maximum | 1547          | 2479.5      | 2626.5      | 1720.5       | 3319         | 2991.5       |
| Average | 748.4         | 1312.5      | 1285.9      | 549.6        | 1754.1       | 1515.7       |

Data set S.10: Median fluorescence intensity (MFI) of the no-template-control (NTC) for different combinations of amount of microspheres in the hybridisation reaction and streptavidin-R-phycoerythrin concentration in the reporter mix (data set related to Figure 4)

| Marker                      | 2500-10ug_pos | 375-4ug_pos | 750-4ug_pos | 2500-4ug_pos | 375-10ug_pos | 750-10ug_pos |
|-----------------------------|---------------|-------------|-------------|--------------|--------------|--------------|
| Internal positive control_1 | 259.5         | 86          | 78          | 84           | 193          | 218          |
| internal positive control_2 | 311           | 77          | 75          | 76           | 192          | 212          |
| SAL-10                      | 318           | 81          | 70          | 91.5         | 191          | 233          |
| SAL-11                      | 294           | 86          | 76          | 91           | 177          | 247.5        |
| SAL-16                      | 299           | 81.5        | 92          | 84           | 201          | 230          |
| SAL-23                      | 263.5         | 82          | 77.5        | 78           | 184.5        | 233.5        |
| SAL-25                      | 314           | 71.5        | 69.5        | 95           | 184          | 242          |
| SAL-29                      | 298           | 75.5        | 68          | 85           | 187          | 216          |
| SAL-33                      | 300.5         | 119         | 113         | 93           | 233.5        | 273          |
| SAL-45                      | 287           | 82          | 65          | 85           | 192          | 250          |
| SAL-49                      | 297           | 81          | 70          | 85           | 175          | 225          |
| SAL-50                      | 316           | 77.5        | 76          | 100          | 192.5        | 234          |
| SAL-51                      | 302           | 97.5        | 66.5        | 90           | 190          | 221          |
| SAL-53                      | 280.5         | 88          | 67          | 76           | 200          | 202.5        |
| SAL-55                      | 275.5         | 85          | 61          | 83           | 179          | 210          |
| SAL-67                      | 300           | 80.5        | 64          | 84           | 151.5        | 222          |
| SAL-68                      | 293           | 76          | 82          | 96           | 157          | 243          |
| SAL-69                      | 293           | 117         | 81          | 89.5         | 206          | 226          |
| SAL-70                      | 290.5         | 72          | 67          | 81           | 178          | 196          |
| SAL-74                      | 331           | 95.5        | 77          | 95           | 190          | 269.5        |
| Mininum                     | 259.5         | 71.5        | 61          | 76           | 151.5        | 196          |
| Maximum                     | 331           | 119         | 113         | 100          | 233.5        | 273          |
| Average                     | 296.2         | 85.6        | 74.8        | 87.1         | 187.7        | 230.2        |
